# Supplementary material
Source: ML conference proceedings conference paper supplement (https://openaccess.thecvf.com/content/CVPR2025/html/Fang_Decoupled_Motion_Expression_CVPR_2025_paper.html)
Supplement: Supplementary file 1 [file Fang_Decoupled_Motion_Expression_CVPR_2025_supplemental.pdf]

# Decoupled Motion Expression Video Segmentation

## Supplementary Material

Here we compare the performance of DMVS on different VIS methods in Sec. 6. In Sec. 7, we present PyTorch-style pseudo-code for DMVS and LMPM to clearly demonstrate our architecture design. Also, more visualizations on MeViS dataset are provided in Sec. 8.

### 6. Performance Comparison of Different VIS

We compare the performance of DMVS on different VIS methods in Tab. 10. Mask2Former-VIS [7] is an offline VIS model based on a simple implementation of Mask2Former. Its results on the VIS datasets are weaker than VITA, and its performance on MeViS is also lower than DMVS based on VITA. CTVIS [50] is the state-of-the-art VIS model, and its performance on the VIS dataset is superior to VITA. But there is no advantage on MeViS mainly because as an on-line model, there are no video queries, only frame queries interact with text information, and the relevant modules of DMVS cannot function effectively.

### 7. Pseudo-code Comparison

As shown in Tab. 9 and Tab. 11, we present PyTorch-style pseudo-code for DMVS and LMPM to clearly demonstrate our architecture design.

Table 9. PyTorch-style pseudo-code of LMPM.

```
def LMPM(video, text):
    # froze
    text_encoder.froze()

    # Mask2Former
    frame_queries = []
    mask_features = []
    for frame in video:
        feature = backbone(frame)
        fq, mf = mask2former(feature)
        frame_queries.append(fq)
        mask_features.append(mf)

    # Text Encoder
    word_features, sen_embed = text_encoder(text)

    # VITA Encoder
    frame_queries = vita_encoder(frame_queries)

    # VITA Decoder
    motion_queries = sen_embed /
        .unsqueeze(0).repeat(k, 1)
    motion_queries = vita_decoder(
        motion_queries, frame_queries)

    return motion_queries
```

Table 10. Performance Comparison of Different VIS.

| Dataset             | $\mathcal{J}\&\mathcal{F}$ | $\mathcal{J}$ | $\mathcal{F}$ |
|---------------------|----------------------------|---------------|---------------|
| Mask2Former-VIS [7] | 46.4                       | 42.8          | 50.0          |
| CTVIS [50]          | 46.8                       | 43.2          | 50.4          |
| VITA [19]           | <b>48.6</b>                | <b>44.2</b>   | <b>52.9</b>   |

Table 11. PyTorch-style pseudo-code of DMVS.

```
def DMVS(video, text):
    # froze
    mask2former.froze()
    vita.froze()
    text_encoder.froze()

    # Mask2Former
    frame_queries = []
    mask_features = []
    for frame in video:
        feature = backbone(frame)
        fq, mf = mask2former(feature)
        frame_queries.append(fq)
        mask_features.append(mf)

    # VITA
    video_queries, class_scores = \
        vita(frame_queries)

    # Text Encoder
    word_features = text_encoder(text)
    motion_cues, static_cues, sen_embed = \
        text_decoupler(word_features)

    # Motion Expression Encoder
    motion_expression = dmvs_encoder(
        motion_cues, static_cues, sen_embed,
        frame_queries, video_queries)

    # Motion Query Decoder
    motion_queries = TopK(
        video_queries, class_scores, k)
    motion_queries = dmvs_decoder(motion_queries,
        motion_expression, word_features)

    return motion_queries
```

### 8. Visualization Results

As shown in Fig. 5, we present more visualization results on MeViS [10]. For example, DsHmp [18] does not understand "slightly moving towards the right", but instead segment all the birds standing on the pole. DMVS accurately understands motion expressions and segment the specified objects.

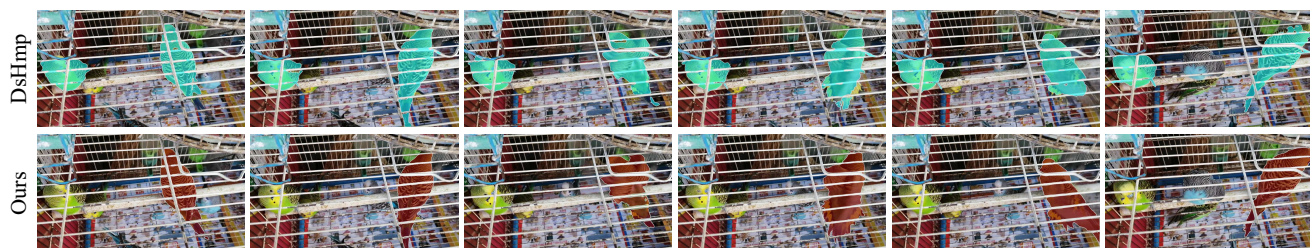

(a) *“The bird standing on the pole, slightly moving towards the right”*

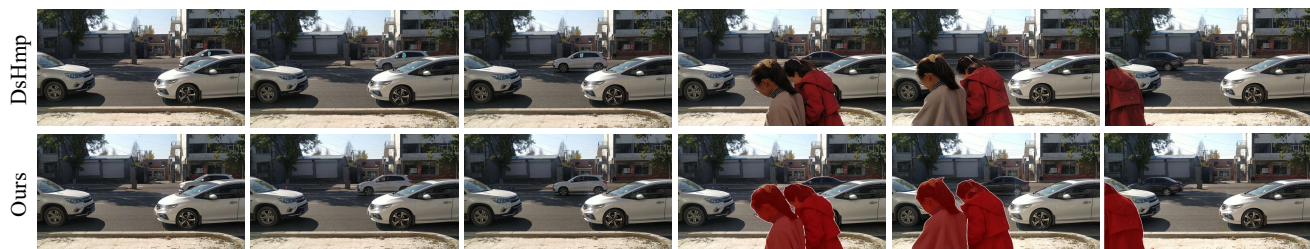

(b) *“The two girls moving towards the left”*

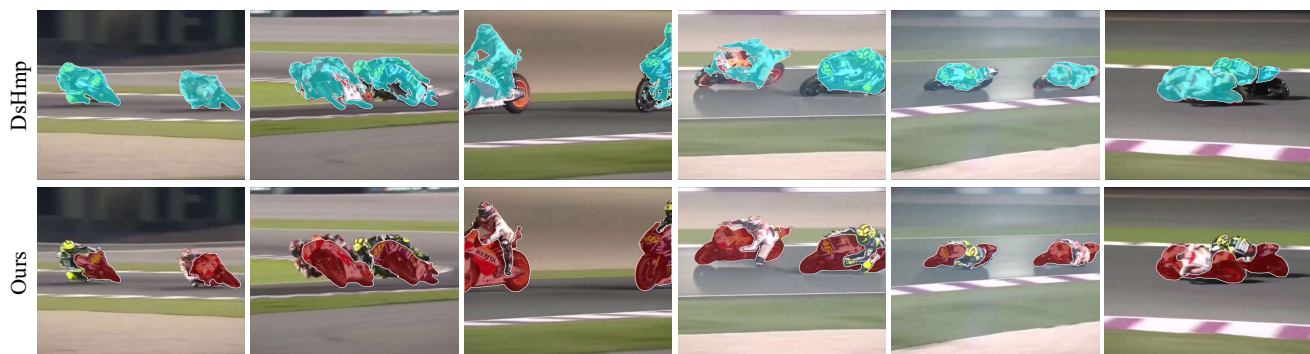

(c) *“A back-and-forth between two motorcycles as they take turns leading the way”*

Figure 5. Qualitative comparison of our method to the main counterpart DsHmp [18] on the MeViS [10] val set.
